# Supplementary material for: Cyclodextrin and Polyethylenimine Functionalized Mesoporous Silica Nanoparticles for Delivery of siRNA Cancer Therapeutics
Source: PubMed Central journal article supplement — Theranostics. 2014 Feb 15;4(5):487–97. doi: 10.7150/thno.8263 (PMC3966054; doi:10.7150/thno.8263), 2014-02-15
Supplement: thnov04p0487s1.pdf [file thnov04p0487s1.pdf]

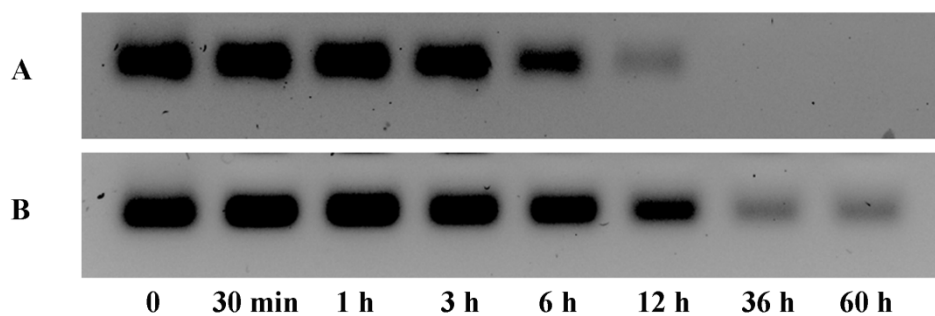

**Figure S1. siRNA stability in serum. (A) Naked siRNA. (B) CP-MSNPs/siRNA. Samples were incubated in 50% FBS at 37 °C for 30 min, 1 h, 3 h, 6 h, 12 h, 36 h and 60 h. After incubation, the samples were run on a 2% agarose gel and visualized by ethidium bromide staining. Each aliquot represents 200  $\mu$ g siRNA in the initial sample.**
